# Supplementary material
Source: Springer Nature journal article supplement (https://www.springermedizin.de/resource/supplementary/12879_2011_1734_MOESM5_ESM.pdf/9443904)

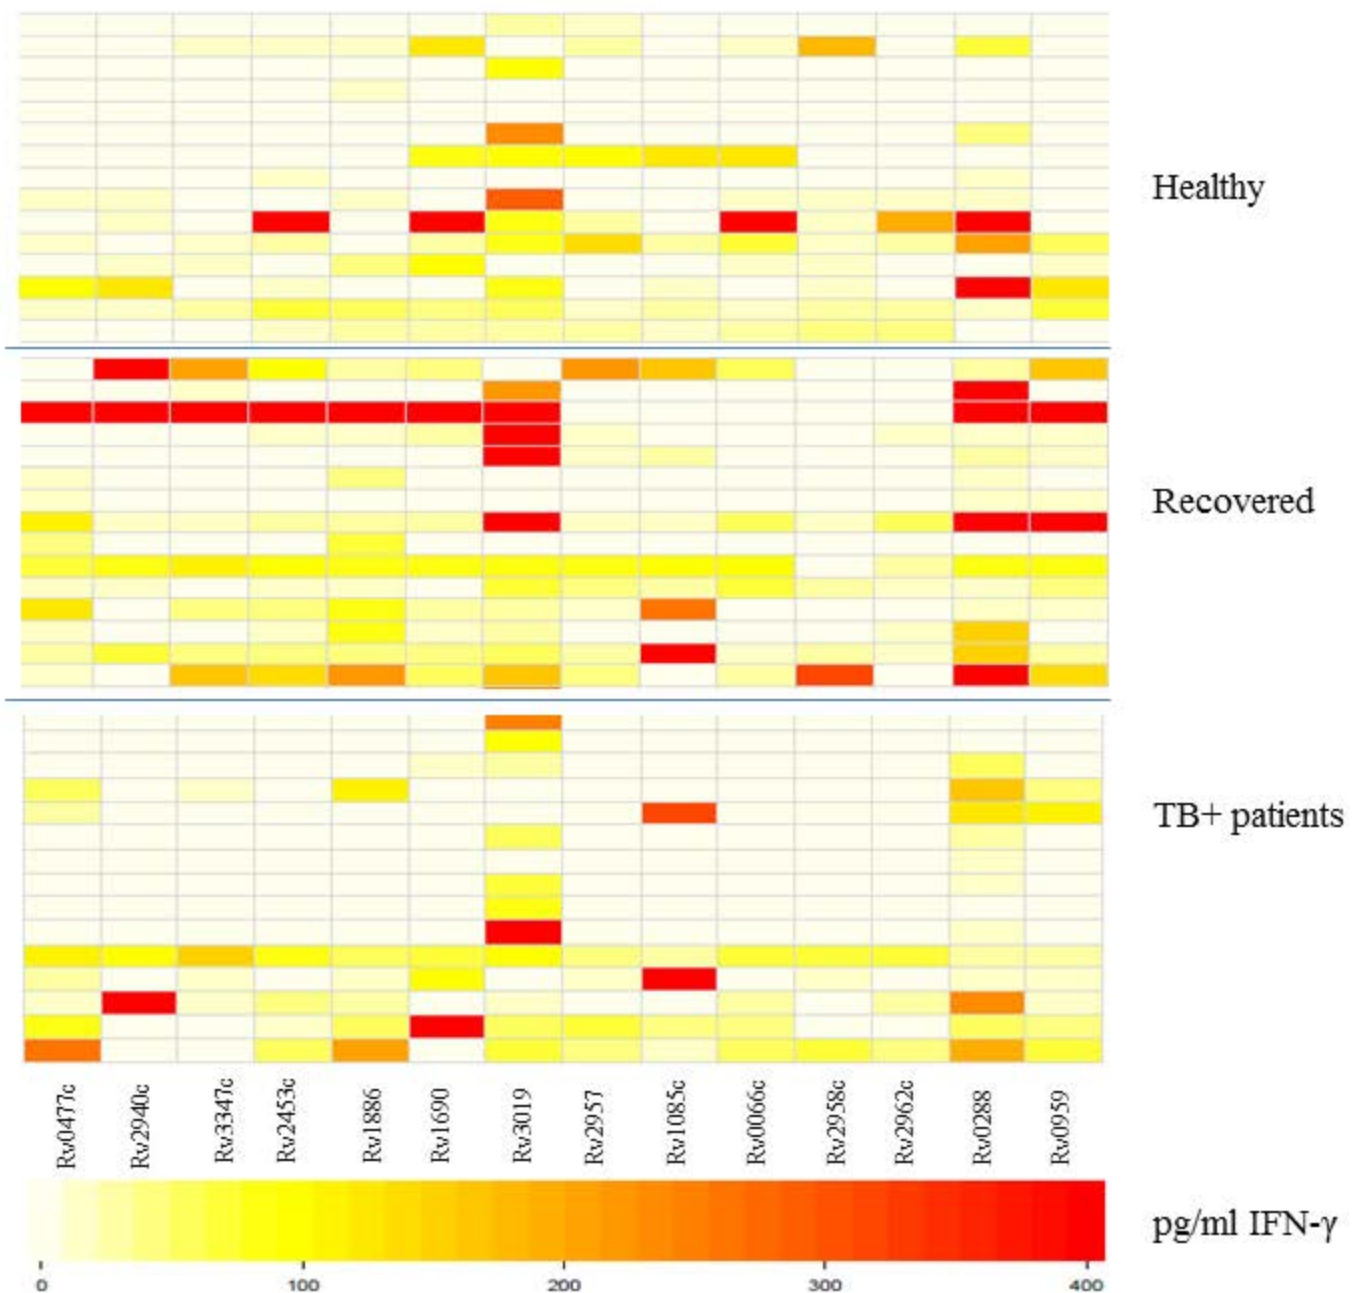

Supplement: MOESM5 [file 9443904]
